# Supplementary material
Source: PubMed Central journal article supplement (PMC3040281)
Supplement: NIHMS268103-supplement-1_si_001.pdf [file NIHMS268103-supplement-1_si_001.pdf]

**SUPPORTING INFORMATION**Structure and Function of YghU, A *Nu*-class Glutathione TransferaseRelated to YfcG from *Escherichia coli*<sup>†,‡</sup>Nina V. Stourman<sup>§,⊥</sup>, Megan C. Branch<sup>§</sup>, Matthew R. Schaab<sup>§</sup>, Joel M. Harp<sup>§</sup>, Jane E. Ladner<sup>||</sup>, andRichard N. Armstrong<sup>§,\*</sup>

*Departments of Biochemistry and Chemistry, Center in Molecular Toxicology, and the Vanderbilt Institute of Chemical Biology, Vanderbilt University, Nashville, TN, 37232-0146, USA and the Institute for Bioscience and Biotechnology Research, University of Maryland, Gudelsky Drive, Rockville, MD 20850*

CLUSTAL 2.0.12 multiple sequence alignment

```

sp|P77526|YFCG_ECOLI          -----MIDLYFA 7
tr|Q4KED9|Q4KED9_PSEF5      -----MSDLSAFA-----VTQKWPAQFPEWIQLYSL 26
sp|Q46845|YGHU_ECOLI        MTDNTYQPAKVWTDKWSAGGAFANINRPVSGPTHEKTLFVKGKHPQLQLYSL 50
                               ::**

sp|P77526|YFCG_ECOLI        PTPNGHKITLFLEEA-----ELDYRLIKVDLGKGGQFRPEFLRISPNNK 51
tr|Q4KED9|Q4KED9_PSEF5      PTPNGVKVSIMLEEI-----GLPYEAHRVSFETQDQMTPEFLSVSPNNK 70
sp|Q46845|YGHU_ECOLI        GTPNGQKVTIMLEELLALGVTGAEYDAWLIRIGDGDQFSSGFVEVNPNSK 100
                               *** *:::***          *   : : .*: . *: :.***.*

sp|P77526|YFCG_ECOLI        IPAIVD-HSPADGGEPLSLFESGAILLYLAEKTGLFLSHETRERAATLQW 100
tr|Q4KED9|Q4KED9_PSEF5      IPAILDPHGPGD--QPLALFESGAILLYLADKSGQLLAQESAARYETIQW 118
sp|Q46845|YGHU_ECOLI        IPALRD-HTHNP---PIRVFESGSILLYLAEKFGYFLPQDLAKRTETMNW 146
                               ***: * *           *: :***:***:***:* * :*:: * *::*

sp|P77526|YFCG_ECOLI        LFWQVGLGPMLGQNHHFNHAAPQTIP--YAIERYQVETQRLYHVLNKRK 148
tr|Q4KED9|Q4KED9_PSEF5      LMFQMGIGGPMFGQVGFNFKFAGREYEDKRPLERYVNEAKRLLGVLDKHL 168
sp|Q46845|YGHU_ECOLI        LFWLQGAAPFLGGGFHFYHYAPVKIE--YAINRFTMEAKRLLDVLDKQL 194
                               *:: * . : * . * : *           .::*: *::** **::*

sp|P77526|YFCG_ECOLI        ENSPWLGGENYSIADIACWPVNAWT-----RQRIDLAMYPAVKNWHE 191
tr|Q4KED9|Q4KED9_PSEF5      GGREWIMGERYTIADIATFPWIRNLIG--FYEAGELVGIDNFPEVKRVL 216
sp|Q46845|YGHU_ECOLI        AQHKFVAGDEYTIADMAIWPWFVGNVVLGGVYDAAEFLDAGSYKHWQRWAK 244
                               :: *:.***:* :**          : : . : *:.

sp|P77526|YFCG_ECOLI        RIRSRPATGQALLKAQLG-----DERSDS----- 215
tr|Q4KED9|Q4KED9_PSEF5      KFVARPAVIRGLEIPKVS----- 234
sp|Q46845|YGHU_ECOLI        EVGERPAVKRGRIVNRTNGPLNEQLHERHDASDFETNTEDKRQG 288
                               .. ***. :. : .

```

**Figure S1:** Sequence alignments between YfcG, YghU from *E. coli* and a similar enzyme from *Pseudomonas fluorescens*. The sequence identities of these proteins are between 38 and 42 %. The residues that are known to interact with GSH in the structures of YfcG and YghU are highlighted in red.
